# Supplementary material for: Boosting the activity and stabilityviasynergistic catalysis of Co nanoparticles and MoC to construct a bifunctional electrocatalyst for high-performance and long-life rechargeable zinc–air batteries
Source: Royal Society of Chemistry journal article supplement (doi:10.1039/d2nr03918d), 2022-01-01
Supplement: d2nr03918d1.pdf [file d2nr03918d1.pdf]

## Support Information

### **Boosting the activity and stability via Co nanoparticles and MoC synergistic catalysis to construct a bifunctional electrocatalyst for high-performance and long-life rechargeable zinc-air batteries**

Xiaohua Deng<sup>a</sup>, Xianrui Gu<sup>b</sup>, Yingjie Deng<sup>a</sup>, Zhu Jiang<sup>a</sup>, Wenxuan Chen<sup>a</sup>,  
Dai Dang<sup>a,\*</sup>, Wei Lin<sup>b,\*</sup>, Bin Chi<sup>a,\*</sup>

<sup>a</sup> School of Chemical Engineering and Light Industry, Guangdong University of Technology, Guangzhou, Guangdong, 510006, P. R. China.

<sup>b</sup> Research Institute of Petroleum Processing, Sinopec, No. 18, Xueyuan Road, Haidian District, Beijing 100083, China.

\* Corresponding author.

E-mail address: [dangdai@gdut.edu.cn](mailto:dangdai@gdut.edu.cn) (d. Dang)

## 1. Characterization

The morphologies and structures of the catalysts were recorded with scanning electron microscopy (SEM, SU8220 Hitachi High-Tech). Transmission electron microscope (TEM) was conducted on a JEOL JEM2100 TEM with a field emission gun operating at 200 kV. EDS analysis was performed on an AMETEK Materials Analysis EDX equipped on the TEM. The phase characteristics of samples are measured on X-ray diffraction (XRD, Dandong Tongda Science & Technology) with a Cu K $\alpha$  radiation ( $\lambda = 1.5406 \text{ \AA}$ ). Raman spectra were performed on UV Laser Raman Spectroscopy (HORIBA) with an excitation wavelength of 633 nm. Specific surface areas were calculated by the Brunauer–Emmert–Teller method. Brunauer–Emmett–Teller (BET) specific surface area and pore size distribution measurement employed a Tristar 3020 gas adsorption analyzer at 77 K. Pore volumes and sizes were estimated from the pore-size distribution curves from the adsorption isotherms using the Barrett–Joyner–Halenda method. X-ray photoelectron spectroscopy (XPS) was conducted with an AXIS Supra by Kratos Analytical Inc. (using monochromatized Al K $\alpha$  radiation (HV = 1486.6 eV, 225 W) as an X-ray source with a base pressure of  $10^{-9}$  torr, A charge neutralizer was used throughout as the samples were mounted such that they were electrically isolated from the sample bar. All spectrums were calibrated by C 1s (284.8 eV).

## 2. Electrochemical measurement

All electrochemical tests were performed on the Ivium Station workstation at room temperature. A three-electrode system evaluated all ORR and OER performance tests. The working electrode was a rotating disk electrode (RDE) with a diameter of 5 mm ( $0.196 \text{ cm}^2$ ) or a rotating ring disk electrode (RRDE) with a diameter of 5.61 mm ( $0.247 \text{ cm}^2$ ). The counter electrode was a graphite rod. The reference electrode was a saturated Ag/AgCl electrode in the acidic medium and a saturated Hg/HgO electrode in the alkaline medium. The cyclic voltammetry (CV) test was carried out in 0.1 M KOH or 0.5 M H<sub>2</sub>SO<sub>4</sub> filled with N<sub>2</sub> or O<sub>2</sub> (scan rate is  $50 \text{ mV}\cdot\text{s}^{-1}$ ). The linear sweep voltammetry (LSV) test was carried out in 0.1 M KOH or 0.5 M H<sub>2</sub>SO<sub>4</sub> filled with O<sub>2</sub>

at a speed range of 1600 rpm (scan rate is  $5 \text{ mV} \cdot \text{s}^{-1}$ ). Current time Chrono current response was measured at 0.66 V (relative to RHE) in the alkaline medium and 0.45 V (relative to RHE) in the acidic medium. The final oxygen reduction currents were obtained by subtracting the background currents measured in the  $\text{N}_2$ -purged electrolyte from those measured in the  $\text{O}_2$ -saturated electrolyte. Current time Chrono current response was estimated at 0.66 V (relative to RHE) in the alkaline medium and 0.45V(relative to RHE) in the acidic medium. In the OER test, the working electrode is a glassy carbon (GC) electrode with a diameter of 3 mm ( $0.07 \text{ cm}^2$ ). The counter electrode is a graphite rod, and the reference electrode is a saturated Hg/HgO electrode. The LSV test is tested in 1 M KOH (scan rate of  $5 \text{ mV} \cdot \text{s}^{-1}$ ).

The catalyst used for the ORR and OER test was prepared as follows: 5 mg of the catalyst was dispersed in a 1 mL mixed solution containing ethanol and Nafion solution (5 wt%). The mixed solution was sonicated for 1 h to form a uniform suspension. Then, take out 20  $\mu\text{L}$  of the catalyst solution from the pipette and drop it evenly on the rotating disk (RDE) electrode. After natural drying, a uniform film is formed. The catalyst load is approximately  $500 \mu\text{g cm}^{-2}$ .

RRDE tests were taken to measure the peroxide ( $\text{H}_2\text{O}_2$ ) yield and the electron transfer number ( $n$ ) using the following equations:

$$\text{H}_2\text{O}_2\% = \frac{i_R/N_0}{i_D + i_R/N_0} \times 200\%$$

$$n = 4 \times \frac{i_D}{i_D + i_R/N_0}$$

$I_D$  is the disk current,  $i_R$  is the ring current, and current collection efficiency (0.37) of RRDE.

OER measurement: Calculate the potential corresponding to the reversible hydrogen electrode (RHE) electrode by the following formula:

$$E_{(RHE)} = E_{\text{Hg/HgO}} + (0.098 + 0.0591 \times PH)$$

The following formula calculates the overpotential ( $\eta$ ):

$$\eta = E_{RHE} - 1.23$$

### 3. Zn-air battery performance test

All ZAB tests were performed at room temperature on the Ivium Station workstation. Each charge and discharge cycle were 20 minutes, and the current density was 5 mA cm<sup>-2</sup>. LSV was recorded to record the charge and discharge polarization curve, and the scan rate was fixed at 10 mV s<sup>-1</sup>. The discharge characteristic curve was obtained by testing at a current density of 20 mA cm<sup>-2</sup>. Both current density and power density were normalized to the effective surface area of the air electrode.

Battery-specific energy calculation formula:

$$\text{specific capacity} = \frac{\text{current} \times \text{service hour}}{\text{weight of consumed zinc}}$$

Energy density calculation formula:

$$\text{energy density} = \frac{\text{current} \times \text{service hour} \times \text{average discharge voltage}}{\text{weight of consumed zinc}}$$

By varying the current density (from 1 mA cm<sup>-2</sup> to 20 mA cm<sup>-2</sup>) for a constant current discharge test, the discharge stability of the ZAB can be observed. Then, the discharge multiplier performance and reversibility of the ZAB were determined by adjusting the current density from 20 mA cm<sup>-2</sup> to 1 mA cm<sup>-2</sup>.

Preparation of the air cathode: A carbon cloth (2×2 cm<sup>2</sup>) was attached to the gas diffusion layer (2×2 cm<sup>2</sup>) by hot pressing. 4 mg of the catalyst was dissolved in 1 mL of ethanol, then dropped into 11 μL of PTFE solution (6 wt%), and sonicated for 30 minutes to form a uniform suspension. Spread the catalyst suspension uniformly on the side of the carbon paper without the microporous layer, with a loading of approximately 1 mg cm<sup>-2</sup>. After the catalyst solvent evaporates, the obtained electrode can be prepared for Zn-air battery assembly and further testing.

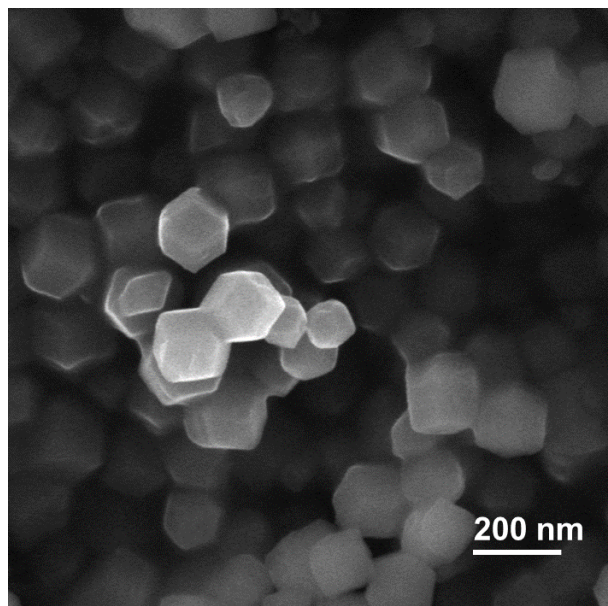

**Fig. S1** The SEM image of the precursor ZIF-CoZn

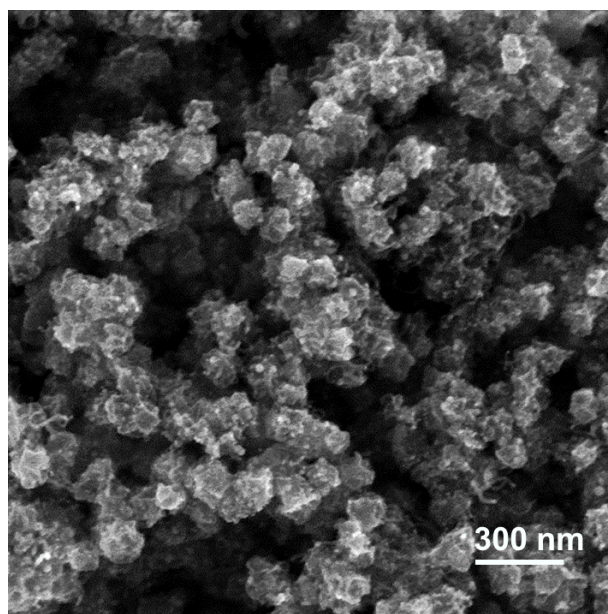

**Fig. S2** The SEM image of the Co-NC

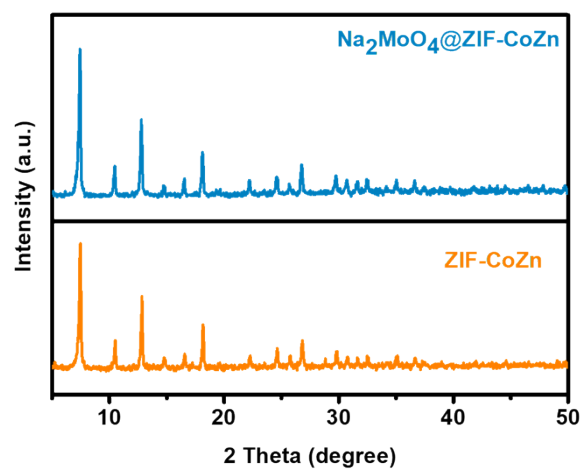

**Fig. S3** The XRD image of ZIF-CoZn and  $\text{Na}_2\text{MoO}_4@\text{ZIF-CoZn}$

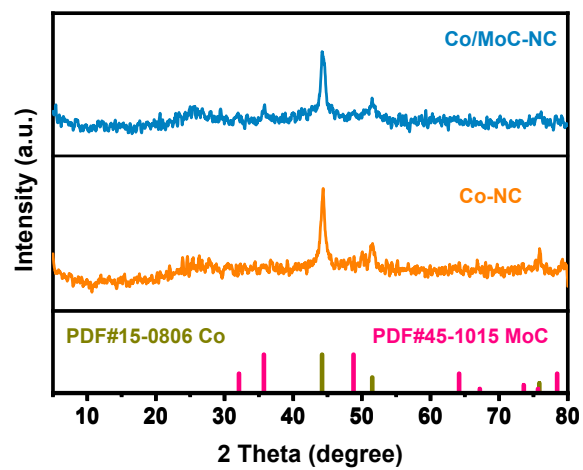

**Fig. S4** The XRD image of  $\text{Co/MoC-NC}$  and  $\text{Co-NC}$

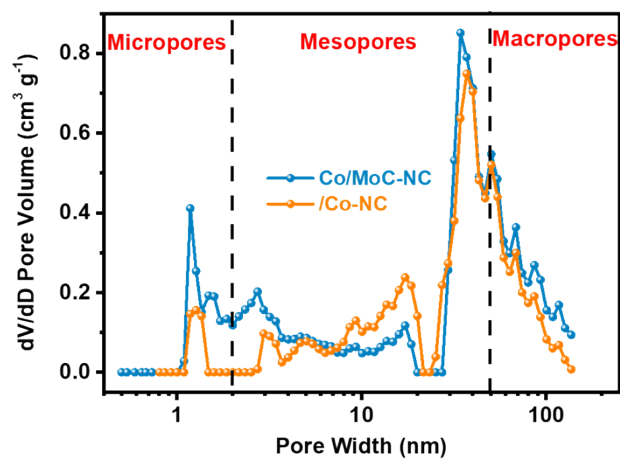

**Fig. S5** The pore size distribution patent of Co/MoC-NC and Co-NC

**Table S1** Surface areas, mesopore volumes, and mesoporosity of Co-NC and Co/MoC-NC

| Sample    | $S_{\text{BET}}$ ( $\text{m}^2 \cdot \text{g}^{-1}$ ) | $V_{\text{mes}}$ ( $\text{cm}^3 \cdot \text{g}^{-1}$ ) | Mesoporosity (%) |
|-----------|-------------------------------------------------------|--------------------------------------------------------|------------------|
| Co-NC     | 248.21                                                | 0.7039                                                 | 63.21            |
| Co/MoC-NC | 395.06                                                | 0.8509                                                 | 65.75            |

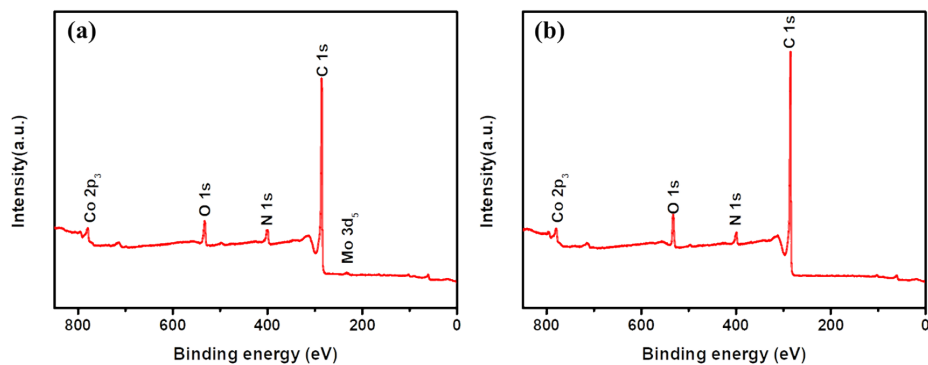

**Fig. S6** The XPS spectrum of (a) Co/MoC-NC and (b) Co-NC

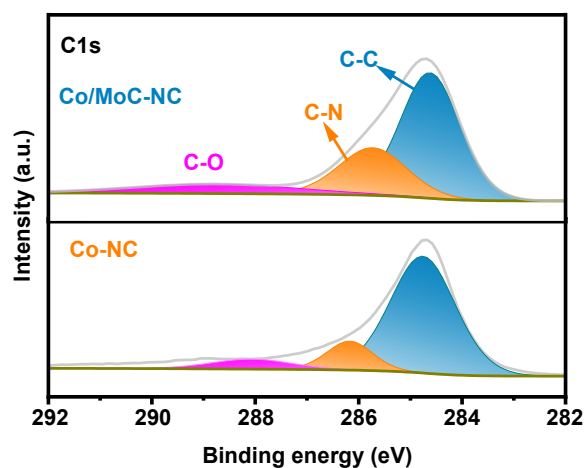

**Fig. S7** High-resolution C1s XPS spectra of Co/MoC-NC and Co-NC

**Table S2** Fraction of the different Co species present in Co-NC and Co/MoC-NC

| Sample    | Co(0) (at %) |                        |                        |            |
|-----------|--------------|------------------------|------------------------|------------|
|           | Co(0) (at %) | Co <sup>3+</sup> (at%) | Co <sup>2+</sup> (at%) | Sat. (at%) |
| Co-NC     | 19.85        | 32.60                  | 36.36                  | 11.19      |
| Co/MoC-NC | 30.94        | 32.30                  | 25.37                  | 11.39      |

**Table S3** Fraction of the different Mo species present in Co/MoC-NC

| Sample    | Mo <sup>6+</sup> (at %) | Mo <sup>4+</sup> (at%) | Mo <sup>2+</sup> (at%) |
|-----------|-------------------------|------------------------|------------------------|
| Co/MoC-NC | 19.93                   | 43.96                  | 36.11                  |



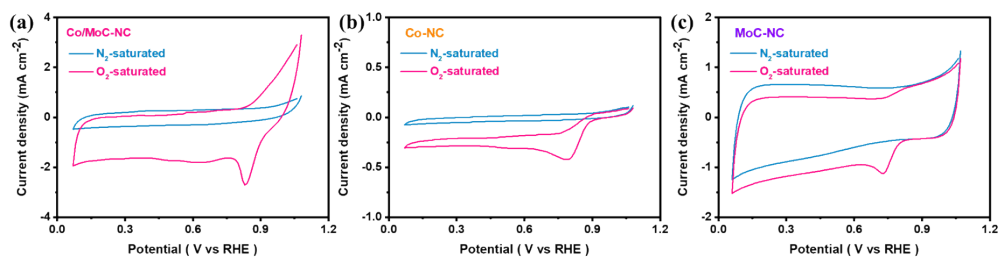

**Fig. S8** In 0.1M KOH, CV curves of (a) Co/MoC-NC, (b) Co-NC, and (c) MoC-NC under O<sub>2</sub> and N<sub>2</sub> saturated conditions

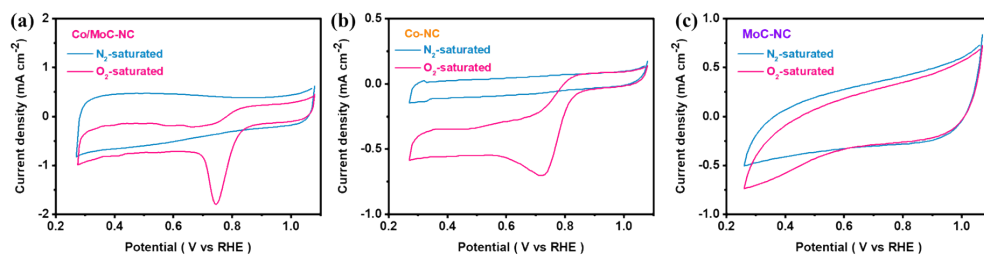

**Figure S9** In 0.5M H<sub>2</sub>SO<sub>4</sub>, CV curves of (a) Co/MoC-NC, (b) Co-NC, and (c) MoC-NC under O<sub>2</sub> and N<sub>2</sub> saturated conditions

**Table S4** ORR performance comparison of various catalysts in alkaline electrolytes

| Catalyst      | E <sub>1/2</sub> (mV vs RHE) | j(mA cm <sup>-2</sup> ) | Reference |
|---------------|------------------------------|-------------------------|-----------|
| Co/Mo-NC      | 0.87                         | 6.5                     | This work |
| Co/NC         | 0.83                         | 4.5                     | [1]       |
| Co/HNCP       | 0.84                         | 5.4                     | [2]       |
| Co 3 mmol N/C | 0.84                         | 6.0                     | [3]       |
| Co@NCNRs      | 0.84                         | 5.5                     | [4]       |

|               |      |     |      |
|---------------|------|-----|------|
| Co-SAs@N-CNS  | 0.84 | 4.7 | [5]  |
| Co-N-C        | 0.80 | 4.5 | [6]  |
| Co/CoO/NG-900 | 0.80 | 4.5 | [7]  |
| Co/N,S-CN-900 | 0.74 | 4.2 | [8]  |
| Co-NC-AD      | 0.86 | 6.2 | [9]  |
| Co/NHPC-800   | 0.82 | 6.4 | [10] |

**Table S5** OER performance comparison of various catalysts in alkaline electrolytes

| Catalyst                               | $\eta_{10}$                  | Electrolyte | Reference |
|----------------------------------------|------------------------------|-------------|-----------|
|                                        | (mV@10 mA cm <sup>-2</sup> ) |             |           |
| Co/Mo-NC                               | 320                          | 1 M KOH     | This work |
| MoS <sub>2</sub> /Co-N-CN <sub>2</sub> | 400                          | 1 M KOH     | [11]      |
| Co <sub>2</sub> P                      | 364                          | 1 M KOH     | [12]      |
| CoMnNiS                                | 371                          | 1 M KOH     | [13]      |
| Co@NrC-0.3                             | 386                          | 1 M KOH     | [14]      |
| P-CoNi@NSCs                            | 350                          | 0.1 M KOH   | [15]      |
| Co-N/C                                 | 330                          | 1 M KOH     | [16]      |
| Co@N-PCNF-1                            | 440                          | 0.1 M KOH   | [17]      |
| Co/N-CNF                               | 380                          | 1 M KOH     | [18]      |
| Co <sub>2</sub> P/doped-CNTs-          |                              |             |           |
| 1000                                   | 343                          | 1 M KOH     | [19]      |
| Co-Ni                                  |                              |             |           |
| (trace)/NCNTs                          | 337                          | 1 M KOH     | [20]      |

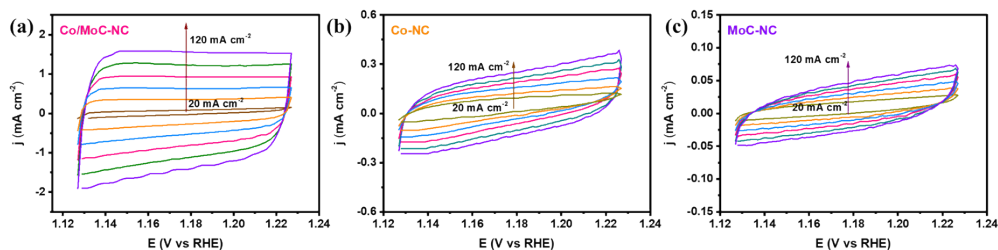

**Figure S10** CV curves of the (a) Co/MoC-NC, (b) Co-NC, and (c) MoC-NC at various scan rates.

**Table S6** Comparison of the ZABs performance

| Catalyst                  | Open circuit | Power density          | Reference |
|---------------------------|--------------|------------------------|-----------|
|                           | voltage(V)   | (mW cm <sup>-2</sup> ) |           |
| Co/MoC-NC                 | 1.51         | 214.5                  | This work |
| Fe/Co/Zn-CNZIF            | 1.46         | 156.7                  | [21]      |
| Co@CNT-NC                 | 1.52         | 179.3                  | [22]      |
| FeZn <sub>4</sub> Co@CNFs | 1.496        | 107.6                  | [23]      |
| CoFe-NCNFs                | 1.522        | 156.3                  | [24]      |
| Co@NCNRs                  | 1.54         | 76.76                  | [4]       |
| Co/N-CNSNs                | 1.47         | 81.7                   | [25]      |
| Co-N-C                    | 1.54         | 132                    | [26]      |
| Co/NHPC-800               | 1.5          | 40                     | [27]      |
| Co/Co-N-C                 | 1.434        | 122.5                  | [28]      |
| Co-NDC                    | 1.3          | 154                    | [29]      |
| Co/CoO@NSC                | 1.53         | 187.6                  | [29]      |
| Co-Ni-S@NSPC              | 1.539        | 100                    | [30]      |
| Co@N-C700                 | 1.41         | 133                    | [31]      |

|                |      |     |      |
|----------------|------|-----|------|
| CNT@SAC-Co/NCP | 1.45 | 172 | [32] |
| Co@hNCTs-800   | 1.45 | 149 | [33] |

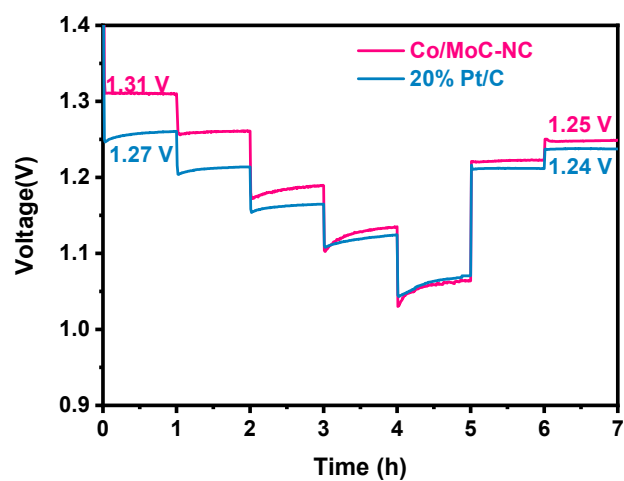

**Fig. S11** Multiplier performance testing of the Zn-air batteries assembled with Co/MoC-NC and 20% Pt/C

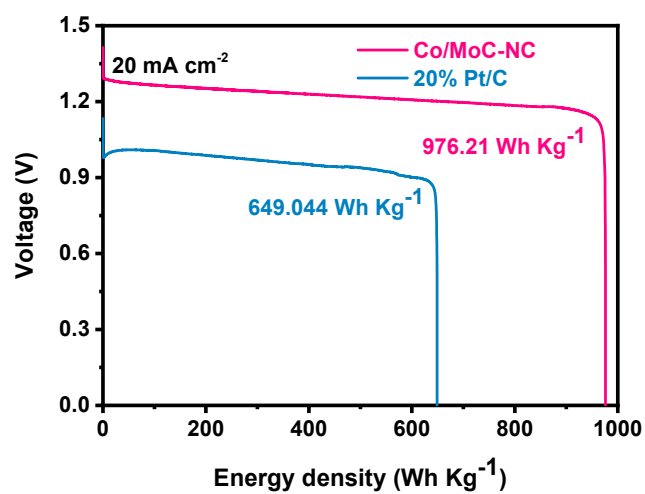

**Fig. S12** Energy density of the Zn-air batteries assembled with Co/MoC-NC and 20% Pt/C

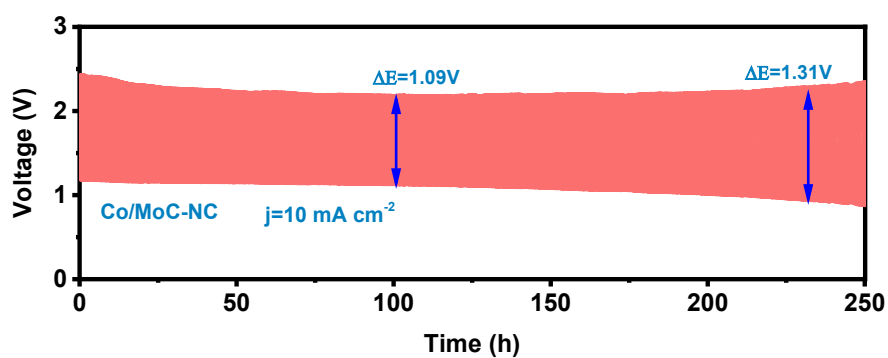

**Fig. S13** Discharge-charge cycling curves of the batteries assembled by Co/MoC-NC at 10 mA cm<sup>-2</sup> (20 min per cycle).

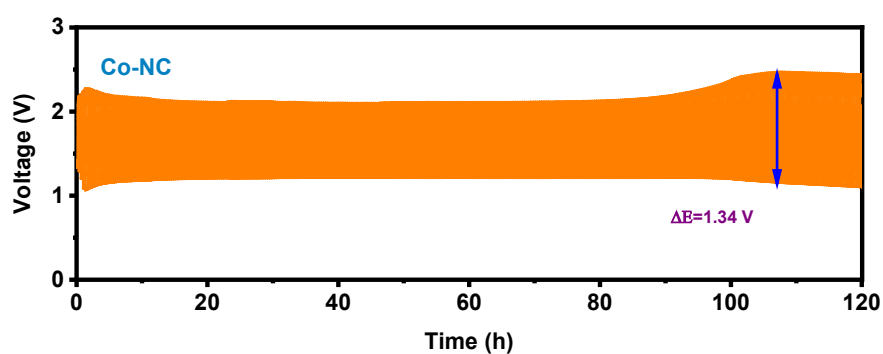

**Fig. S14** Discharge-charge cycling curves of the batteries assembled by Co-NC at 5 mA cm<sup>-2</sup> (20 min per cycle).

**Table S7** Comparison of the ability of ZABs assembled with different catalysts

| Catalyst            | Density current        |         | Reference |
|---------------------|------------------------|---------|-----------|
|                     | (mA cm <sup>-2</sup> ) | Hour(h) |           |
| Co/MoC-NC           | 5                      | 300     | This work |
| Co/MoC-NC           | 10                     | 250     | This work |
| CoNi-CoO-NiO@NC-800 | 2                      | 78      | [34]      |

|                                       |    |     |      |
|---------------------------------------|----|-----|------|
| Mn-CoNx/N-PC                          | 5  | 35  | [35] |
| Co-N-C                                | 5  | 50  | [36] |
| Co@N-C/PCNF                           | 5  | 90  | [37] |
| FeCo/NG                               | 5  | 100 | [38] |
| Co@bCNTs                              | 5  | 110 | [39] |
| Co <sub>9</sub> S <sub>8</sub> /CoNSC | 10 | 40  | [40] |
| Co/N-CNFs                             | 10 | 50  | [41] |
| CuCoSe@NC-2                           | 10 | 130 | [42] |
| Co/N-CNTs-2                           | 10 | 200 | [43] |

## Reference

- [1] A. Aijaz, J. Masa, C. Rosler, W. Xia, P. Weide, A.J.R. Botz, R.A. Fischer, W. Schuhmann, M. Muhler, Co@Co<sub>3</sub>O<sub>4</sub> Encapsulated in Carbon Nanotube-Grafted Nitrogen-Doped Carbon Polyhedra as an Advanced Bifunctional Oxygen Electrode, *Angew Chem Int Edit*, 55 (2016) 4087-4091.
- [2] D.N. Ding, K. Shen, X.D. Chen, H.R. Chen, J.Y. Chen, T. Fan, R.F. Wu, Y.W. Li, Multi-Level Architecture Optimization of MOF-Templated Co-Based Nanoparticles Embedded in Hollow N-Doped Carbon Polyhedra for Efficient OER and ORR, *Acs Catal*, 8 (2018) 7879-7888.
- [3] K. Seonghee, J. Seulgi, Y. Hyunsoo, S. Hyunji, C. Heechae, K. Jun, L.L. Oi, Near surface electric field enhancement: Pyridinic-N rich few-layer graphene encapsulating cobalt catalysts as highly active and stable bifunctional ORR/OER catalyst for seawater batteries, *Applied Catalysis B: Environmental*, (2022).
- [4] Y. Qiang, L. Jianshuai, L. Jiantao, Y. Ruohan, W. Jinsong, X. Shibo, L. Xinyuan, X. Nuo, Z. Liang, M. Liqiang, ZIF-mediated anchoring of Co species on N-doped carbon nanorods as an efficient cathode catalyst for Zn-air batteries, *Energy Environ Mater*, (2022).
- [5] L.B. Zong, K.C. Fan, W.C. Wu, L.X. Cui, L.L. Zhang, B. Johannessen, D.C. Qi, H.J. Yin, Y. Wang, P.R. Liu, L. Wang, H.J. Zhao, Anchoring Single Copper Atoms to Microporous Carbon Spheres as High-Performance Electrocatalyst for Oxygen Reduction Reaction, *Adv Funct Mater*, 31 (2021).
- [6] M.R. Liu, H. Lin, Z.W. Mei, J.L. Yang, J. Lin, Y.D. Liu, F. Pan, Tuning Cobalt and Nitrogen Co-Doped Carbon to Maximize Catalytic Sites on a Superabsorbent Resin for Efficient Oxygen Reduction, *Chemsuschem*, 11 (2018) 3631-3639.
- [7] W. Jing, Z. Haihong, E.-W. Luis Alberto, L. Huiyu, A.-V. Nicolas, L. Danqing, T. Pinggui, F. Yongjun, Synthesis and electrocatalytic performance of N-doped graphene embedded with Co/CoO nanoparticles towards oxygen evolution and reduction reactions, *Catal Commun*, (2022).
- [8] S. Rui-Min, R. Qi-Dong, F. Jiu-Ju, Z. Lu, W. Ai-Jun, Sandwich-like superstructure of in-situ self-assembled hetero-structured carbon nanocomposite for improving

electrocatalytic oxygen reduction, *J Colloid Interf Sci*, (2022).

[9] F. Yu, S. Kexin, Z. Wei, Z. Xinyan, Y. Seung Jo, K. Jin-Gyu, Q. Sifan, Q. Yugang, Z. Xu, C. Zhongjun, Q. Tingting, Y. Nailin, W. Zizhun, L. Dabing, Z. Weitao, Efficient ORR catalysts for zinc-air battery: Biomass-derived ultra-stable Co nanoparticles wrapped with graphitic layers via optimizing electron transfer, *J Energy Chem*, (2022).

[10] Z. Wenshu, L. Yanyan, L. Huan, W. Dichao, Z. Gaoyue, J. Jianchun, Co/N-Doped hierarchical porous carbon as an efficient oxygen electrocatalyst for rechargeable Zn–air battery, *Rsc Adv*, (2021).

[11] X.B. Hou, H.M. Zhou, M. Zhao, Y.B. Cai, Q.F. Wei, MoS<sub>2</sub> Nanoplates Embedded in Co-N-Doped Carbon Nanocages as Efficient Catalyst for HER and OER, *Acs Sustain Chem Eng*, 8 (2020) 5724-5733.

[12] B.T. Jebaslinhepzybai, T. Partheeban, D.S. Gavali, R. Thapa, M. Sasidharan, One-pot solvothermal synthesis of Co<sub>2</sub>P nanoparticles: An efficient HER and OER electrocatalysts, *Int J Hydrogen Energ*, 46 (2021) 21924-21938.

[13] M. Verma, L. Sinha, P.M. Shirage, Electrodeposited nanostructured flakes of cobalt, manganese and nickel-based sulfide (CoMnNiS) for electrocatalytic alkaline oxygen evolution reaction (OER), *J Mater Sci-Mater El*, 32 (2021) 12292-12307.

[14] J. Yu, Y.W. Dai, Z.B. Zhang, T. Liu, S.Y. Zhao, C. Cheng, P. Tan, Z.P. Shao, M. Ni, Tailoring structural properties of carbon via implanting optimal co nanoparticles in n-rich carbon cages toward high-efficiency oxygen electrocatalysis for rechargeable zn-air batteries, *Carbon Energy*, (2022).

[15] H. Xianhong, F. Jing, N. Mengyuan, L. Pengfei, Z. Qing, B. Zhengyu, Y. Lin, Long-range interconnected nanoporous Co/Ni/C composites as bifunctional electrocatalysts for long-life rechargeable zinc-air batteries, *Electrochim Acta*, (2022).

[16] W. Zhang, C.H. Xu, H. Zheng, R. Li, K. Zhou, Oxygen-Rich Cobalt-Nitrogen-Carbon Porous Nanosheets for Bifunctional Oxygen Electrocatalysis, *Adv Funct Mater*, (2022).

[17] W. Mingxing, T. Xiyao, Y. Wenlu, G. Bingran, G. Jianing, Co nanoparticles embedded in wheat-like porous carbon nanofibers as bifunctional electrocatalysts for rechargeable zinc-air batteries, *Electrochim Acta*, (2022).



- [18] L. Jin, Z. Jinsong, K.H.L. Michael, Valence Engineering of Polyvalent Cobalt Encapsulated in a Carbon Nanofiber as an Efficient Trifunctional Electrocatalyst for the Zn–Air Battery and Overall Water Splitting, *Acs Appl Mater Inter*, (2022).
- [19] S. Li, F. Haiyun, F. Xiaoli, G. Hao, W. Tao, H. Jianping, A simultaneous phosphorization and carbonization strategy to synthesize a defective Co<sub>2</sub>P/doped-CNTs composite for bifunctional oxygen electrocatalysis, *Chem Eng J*, (2022).
- [20] Y.D. Shi, J.N. Cai, X.F. Zhang, Z.S. Li, S. Lin, Promotional effects of trace Ni on its dual-functional electrocatalysis of Co/N-doped carbon nanotube catalysts for ORR and OER, *Int J Hydrogen Energ*, 47 (2022) 7761-7769.
- [21] G. Zanwu, M. Yanan, Z. Yueju, S. Yi, T. Shaoru, W. Qian, L. Wei, Trimetallic ZIFs-derived porous carbon as bifunctional electrocatalyst for rechargeable Zn-air battery, *J Power Sources*, (2022).
- [22] G. Bifen, T. Mingyue, X. Wenhao, L. Xiufang, L. Zongnan, S. Manrong, L. Bizhou, Co-embedded carbon nanotubes modified N-doped carbon derived from poly(Schiff base) and zeolitic imidazole frameworks as efficient oxygen electrocatalyst towards rechargeable Zn-air battery, *J Power Sources*, (2022).
- [23] W. Fuling, X. Zuoxu, L. Xue, R. Jianwei, X. Tao, L. Zhi, L. Xiyu, C. Yanli, Strategic design of cellulose nanofibers@zeolitic imidazolate frameworks derived mesoporous carbon-supported nanoscale CoFe<sub>2</sub>O<sub>4</sub>/CoFe hybrid composition as trifunctional electrocatalyst for Zn-air battery and self-powered overall water-splitting, *J Power Sources*, (2021).
- [24] L. Shi-Yi, C. Yu-Ping, C. Ying, Z. Lu, F. Jiu-Ju, W. Ai-Jun, Aminouracil-assisted synthesis of CoFe decorated bougainvillea-like N-doped carbon nanoflowers for boosting Zn–air battery and water electrolysis, *J Power Sources*, (2021).
- [25] X.X. Huang, Y.L. Zhang, H.M. Shen, W. Li, T. Shen, Z. Ali, T. Tang, S.J. Guo, Q. Sun, Y.L. Hou, N-Doped Carbon Nanosheet Networks with Favorable Active Sites Triggered by Metal Nanoparticles as Bifunctional Oxygen Electrocatalysts, *Acs Energy Lett*, 3 (2018) 2914-2920.
- [26] Y. Peng, W. Lei, S. Fanfei, X. Ying, L. Xu, M. Jingyuan, W. Xiuwen, T. Chungui, L. Jinghong, F. Honggang, Co Nanoislands Rooted on Co–N–C Nanosheets as Efficient

Oxygen Electrocatalyst for Zn–Air Batteries, *Adv Mater*, (2019).

[27] P. Yu, L. Wang, F.F. Sun, Y. Xie, X. Liu, J.Y. Ma, X.W. Wang, C.G. Tian, J.H. Li, H.G. Fu, Co Nanoislands Rooted on Co-N-C Nanosheets as Efficient Oxygen Electrocatalyst for Zn-Air Batteries, *Adv Mater*, 31 (2019).

[28] D. Wang, P.X. Yang, H. Xu, J.Y. Ma, L. Du, G.X. Zhang, R.P. Li, Z. Jiang, Y. Li, J.Q. Zhang, M.Z. An, The dual-nitrogen-source strategy to modulate a bifunctional hybrid Co/Co-N-C catalyst in the reversible air cathode for Zn-air batteries, *J Power Sources*, 485 (2021).

[29] Z.Y. Chen, Q.C. Wang, X.B. Zhang, Y.P. Lei, W. Hu, Y. Luo, Y.B. Wang, N-doped defective carbon with trace Co for efficient rechargeable liquid electrolyte-/all-solid-state Zn-air batteries, *Sci Bull*, 63 (2018) 548-555.

[30] D. Zhou, H.Q. Fu, J.L. Long, K. Shen, X.L. Gou, Novel fusiform core-shell-MOF derived intact metal@carbon composite: An efficient cathode catalyst for aqueous and solid-state Zn-air batteries, *J Energy Chem*, 64 (2022) 385-394.

[31] W.G. Fang, H.B. Hu, T.T. Jiang, G. Li, M.Z. Wu, N- and S-doped porous carbon decorated with in-situ synthesized Co-Ni bimetallic sulfides particles: A cathode catalyst of rechargeable Zn-air batteries, *Carbon*, 146 (2019) 476-485.

[32] J.C. Li, Y. Meng, L.L. Zhang, G.Z. Li, Z.C. Shi, P.X. Hou, C. Liu, H.M. Cheng, M.H. Shao, Dual-Phasic Carbon with Co Single Atoms and Nanoparticles as a Bifunctional Oxygen Electrocatalyst for Rechargeable Zn-Air Batteries, *Adv Funct Mater*, 31 (2021).

[33] Q.Y. Zhou, Z. Zhang, J.J. Cai, B. Liu, Y.L. Zhang, X.F. Gong, X.L. Sui, A.P. Yu, L. Zhao, Z.B. Wang, Z.W. Chen, Template-guided synthesis of Co nanoparticles embedded in hollow nitrogen doped carbon tubes as a highly efficient catalyst for rechargeable Zn-air batteries, *Nano Energy*, 71 (2020).

[34] X.D. Duan, S.S. Ren, F.Y. Ge, X.K. Zhu, M.D. Zhang, H.G. Zheng, MOF-derived CoNi,CoO,NiO@N-C bifunctional oxygen electrocatalysts for liquid and all-solid-state Zn-air batteries, *Nanoscale*, 13 (2021) 17655-17662.

[35] H.Z. Zheng, F. Ma, H.C. Yang, X.G. Wu, R. Wang, D.L. Jia, Z.X. Wang, N.D. Lu, F. Ran, S.L. Peng, Mn, N co-doped Co nanoparticles/porous carbon as air cathode for

highly efficient rechargeable Zn-air batteries, *Nano Res*, 15 (2022) 1942-1948.

[36] Y. Gao, D.B. Kong, F.L. Cao, S. Teng, T. Liang, B. Luo, B. Wang, Q.H. Yang, L.J. Zhi, Synergistically tuning the graphitic degree, porosity, and the configuration of active sites for highly active bifunctional catalysts and Zn-air batteries, *Nano Res*, (2022).

[37] Q. Lu, H. Wu, X.R. Zheng, Y.A. Chen, A.L. Rogach, X.P. Han, Y.D. Deng, W.B. Hu, Encapsulating Cobalt Nanoparticles in Interconnected N-Doped Hollow Carbon Nanofibers with Enriched Co-N-C Moiety for Enhanced Oxygen Electrocatalysis in Zn-Air Batteries, *Adv Sci*, 8 (2021).

[38] C. Yingjie, G. Chong, M. Xiangyu, C. Xing, L. Guofu, S. Qiong, P. Beili, Z. Qian, F. Jianguang, Y. Liyan, D. Lifeng, Molten Salt-Assisted Carbonization and Unfolding of Fe, Co-codoped ZIF-8 to Engineer Ultrathin Graphite Flakes for Bifunctional Oxygen Electrocatalysis, *J Alloy Compd*, (2022).

[39] Z. Li, X. Lin, W. Xi, M. Shen, B. Gao, Y. Chen, Y. Zheng, B. Lin, Bamboo-like N,S-doped carbon nanotubes with encapsulated Co nanoparticles as high-performance electrocatalyst for liquid and flexible all-solid-state rechargeable Zn-air batteries, *Appl Surf Sci*, (2022).

[40] J. Zhang, B. Cui, S. Jiang, H. Liu, M. Dou, Construction of three-dimensional cobalt sulfide/multi-heteroatom co-doped porous carbon as an efficient trifunctional electrocatalyst, *Nanoscale*, (2022).

[41] J. Liu, J. Zhou, M.K.H. Leung, Valence Engineering of Polyvalent Cobalt Encapsulated in a Carbon Nanofiber as an Efficient Trifunctional Electrocatalyst for the Zn–Air Battery and Overall Water Splitting, *Acs Appl Mater Inter*, (2022).

[42] H. Zhang, X. Wang, Z. Li, C. Zhang, S. Liu, In situ encapsulation engineering boosts the electrochemical performance of highly graphitized N-doped porous carbon-based copper–cobalt selenides for bifunctional oxygen electrocatalysis, *Nanoscale*, (2021).

[43] X. Zhou, X.Y. Leng, C. Ling, H.B. Chong, A.W. Xu, Z.K. Yang, Integrating a metal framework with Co-confined carbon nanotubes as trifunctional electrocatalysts to boost electron and mass transfer approaching practical applications, *Nanoscale*, 13

(2021) 12651-12658.
